# Supplementary material for: A paradigm for the efficient synthesis of bio-based polycarbonate with deep eutectic solvents as catalysts by inhibiting the degradation of molecular chains
Source: Royal Society of Chemistry journal article supplement (doi:10.1039/d1gc01150b), 2021-01-01
Supplement: d1gc01150b1.pdf [file d1gc01150b1.pdf]

## Supporting information

### **Paradigm for efficient synthesis of bio-based polycarbonate with deep eutectic solvents as catalysts by inhibiting the degradation of molecular chains**

Weiwei Wang <sup>a,b</sup>, Zifeng Yang <sup>a,b</sup>, Yaqin Zhang <sup>a</sup>, Hongyan He <sup>a,b,c</sup>, Wenjuan Fang <sup>a</sup>, Zhencai Zhang <sup>b</sup> and Fei Xu <sup>\*a,b,c,d</sup>

<sup>a</sup> CAS Key Laboratory of Green Process and Engineering, State Key Laboratory of Multiphase Complex Systems, Beijing Key Laboratory of Ionic Liquids Clean Process, Institute of Process Engineering, Chinese Academy of Sciences, Beijing 100190, China.

<sup>b</sup> School of Chemical Engineering, University of Chinese Academy of Sciences, Beijing 100049, China.

<sup>c</sup> Dalian National Laboratory for Clean Energy, Dalian 116023, China.

<sup>d</sup> Zhongke Langfang Institute of Process Engineering, Langfang 065001, China.

E-mail: [fxu@ipe.ac.cn](mailto:fxu@ipe.ac.cn);

## Characterization of DESs

### [EminOH]Cl

$^1\text{H}$  NMR (600 MHz, DMSO)  $\delta$  9.19 (s, 1H), 7.79 (d,  $J = 1.7$  Hz, 1H), 7.75 (d,  $J = 1.7$  Hz, 1H), 5.49 (s, 1H), 4.26 – 4.22 (m, 2H), 3.87 (s, 3H), 3.70 (d,  $J = 5.0$  Hz, 2H). FT-IR (KBr)  $\nu$ : 3439, 3145, 3057, 2955, 2871, 1649, 1568, 1444, 1347, 1169, 1067, 937, 1067, 862, 787, 746, 613  $\text{cm}^{-1}$ .

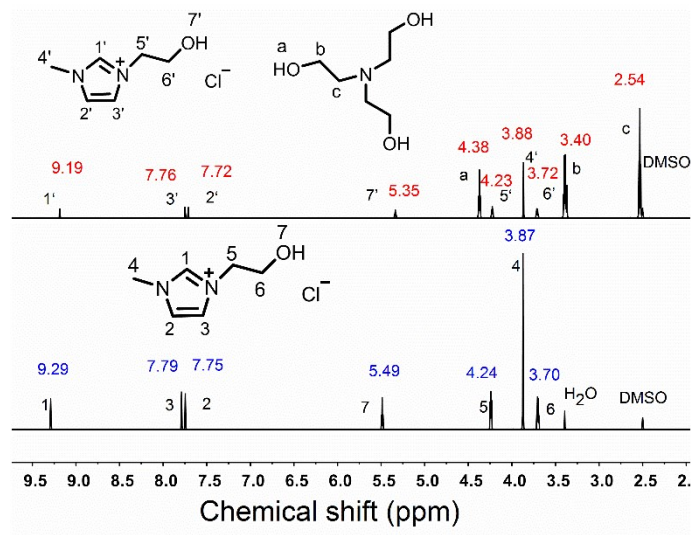

Figure S1.  $^1\text{H}$  NMR spectra of [EminOH]Cl-2TEOA and [EminOH]Cl.

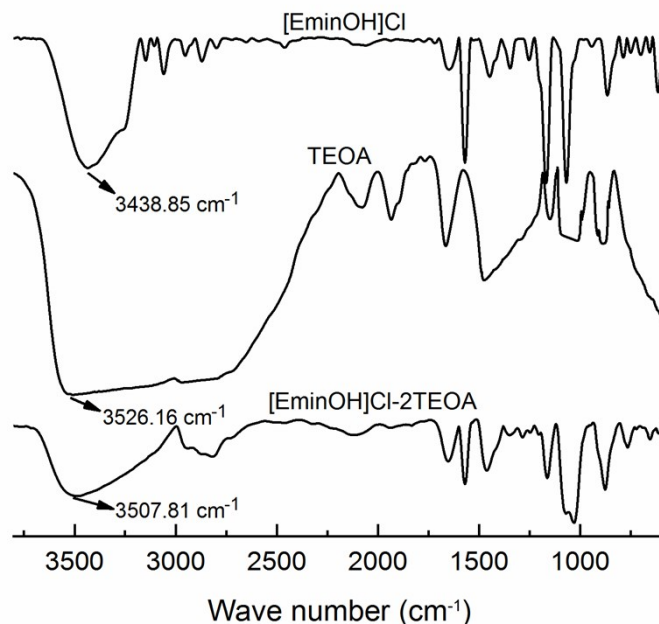

Figure S2. FT-IR spectra of [EminOH]Cl, TEOA and [EminOH]Cl-2TEOA.

### [EminOH]Cl-2TEOA

$^1\text{H}$  NMR (600 MHz, DMSO)  $\delta$  9.19 (s, 1H), 7.76 (t,  $J = 1.7$  Hz, 1H), 7.72 (t,  $J = 1.7$  Hz, 1H), 5.35 (s, 1H), 4.38 (t,  $J = 5.6$  Hz, 6H), 4.25 – 4.21 (m, 2H), 3.88 (s, 3H), 3.72 (d,  $J = 5.0$  Hz, 2H), 3.40 (q,  $J = 6.0$  Hz, 12H), 2.54 (t,  $J = 6.2$  Hz, 12H). FT-IR

(KBr)  $\nu$ : 3508, 2949, 3057, 2817, 2114, 1655, 1573, 1459, 1354, 1287, 1164, 1031, 870, 770, 650  $\text{cm}^{-1}$ .

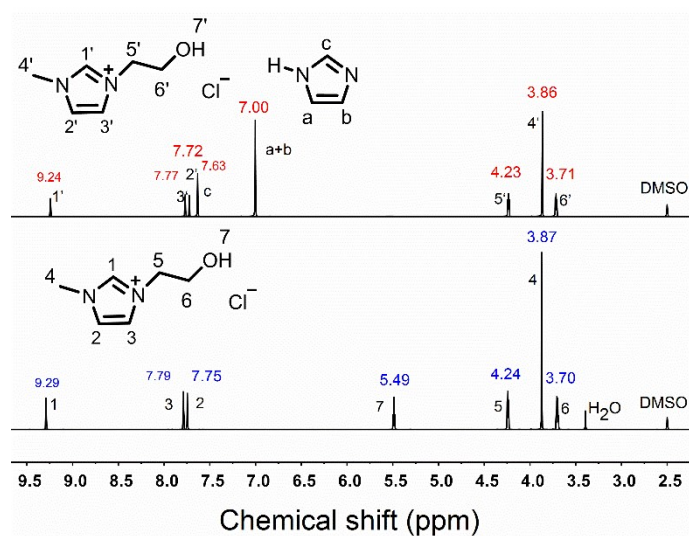

**Figure S3.**  $^1\text{H}$  NMR spectra of  $[\text{EminOH}]\text{Cl}\cdot 2\text{IM}$  and  $[\text{EminOH}]\text{Cl}$ .

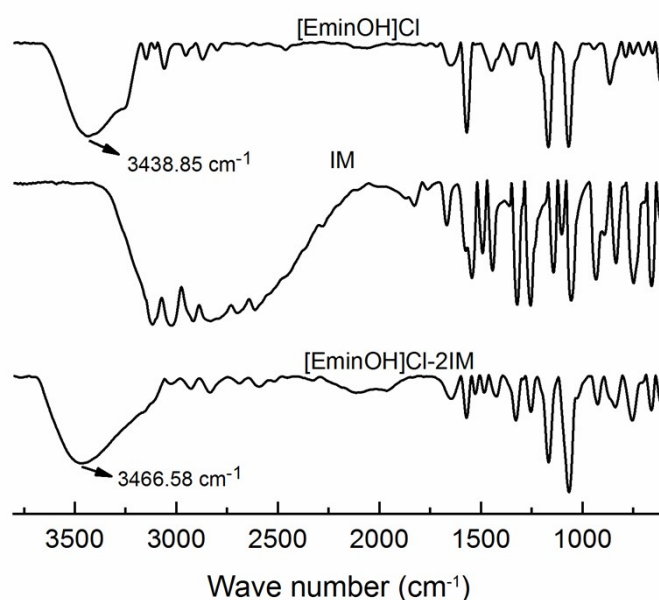

**Figure S4.** FT-IR spectra of  $[\text{EminOH}]\text{Cl}$ , IM and  $[\text{EminOH}]\text{Cl}\cdot 2\text{IM}$ .

### **$[\text{EminOH}]\text{Cl}\cdot 2\text{IM}$**

$^1\text{H}$  NMR (600 MHz, DMSO)  $\delta$  9.24 (s, 1H), 7.77 (t,  $J = 1.7$  Hz, 1H), 7.72 (t,  $J = 1.7$  Hz, 1H), 7.63 (s, 2H), 7.00 (d,  $J = 0.8$  Hz, 4H), 4.23 (dd,  $J = 6.6, 3.5$  Hz, 2H), 3.86 (s, 3H), 3.75 – 3.67 (m, 2H). FT-IR (KBr)  $\nu$ : 3467, 3021, 2932, 2833, 1647, 1572, 1522, 1481, 1429, 1325, 1254, 1164, 1062, 927, 846, 757, 663, 613  $\text{cm}^{-1}$ .

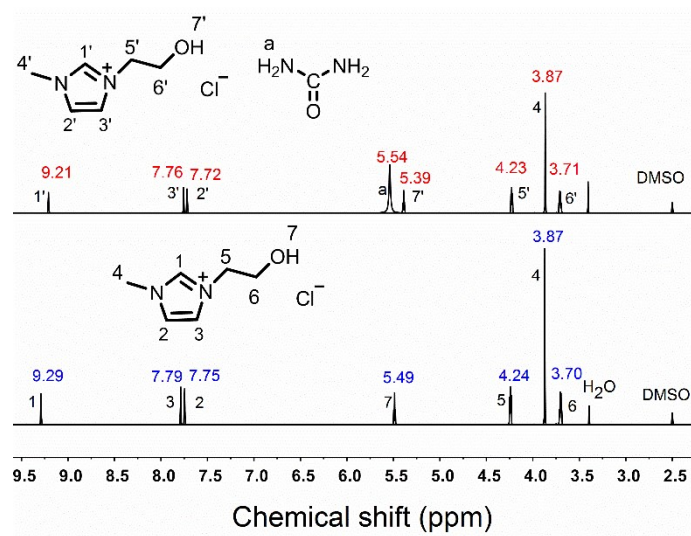

**Figure S5.**  $^1\text{H}$  NMR spectra of  $[\text{EminOH}]\text{Cl}\cdot 2\text{UREA}$  and  $[\text{EminOH}]\text{Cl}$ .

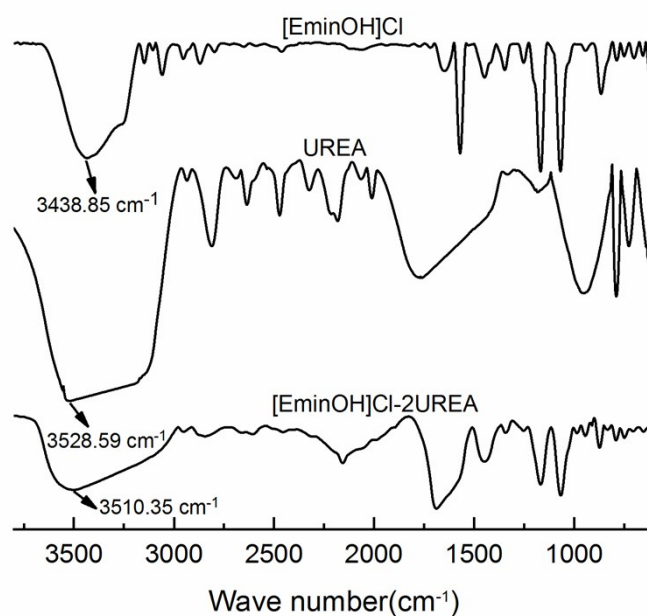

**Figure S6.** FT-IR spectra of  $[\text{EminOH}]\text{Cl}$ , UREA and  $[\text{EminOH}]\text{Cl}\cdot 2\text{UREA}$ .

### **$[\text{EminOH}]\text{Cl}\cdot 2\text{UREA}$**

$^1\text{H}$  NMR (600 MHz, DMSO)  $\delta$  9.21 (s, 1H), 7.76 (t,  $J = 1.7$  Hz, 1H), 7.72 (t,  $J = 1.7$  Hz, 1H), 5.54 (s, 8H), 5.39 (t,  $J = 5.3$  Hz, 1H), 4.25 – 4.18 (m, 2H), 3.87 (s, 3H), 3.71 (dd,  $J = 10.2, 5.2$  Hz, 2H). FT-IR (KBr)  $\nu$ : 3510, 2957, 2849, 2154, 1686, 1449, 1339, 1250, 1163, 1070, 871, 786, 745  $\text{cm}^{-1}$ .

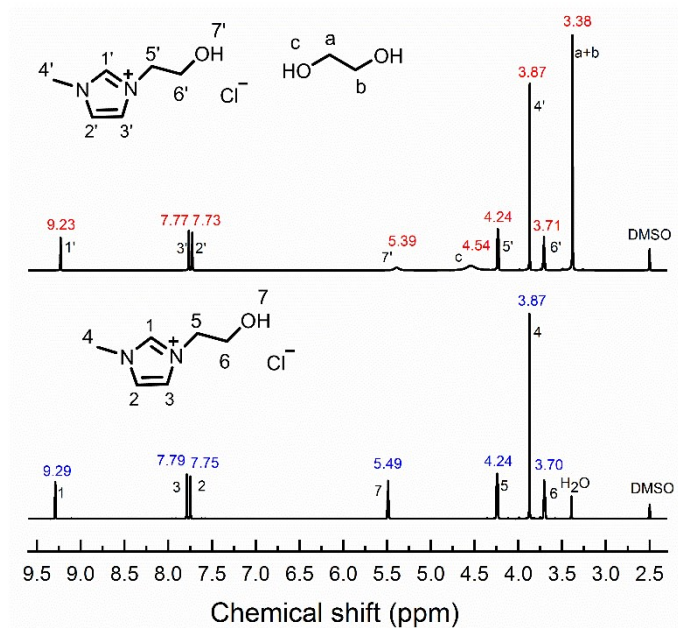

**Figure S7.**  $^1\text{H}$  NMR spectra of  $[\text{EminOH}]\text{Cl}\cdot 2\text{EG}$  and  $[\text{EminOH}]\text{Cl}$ .

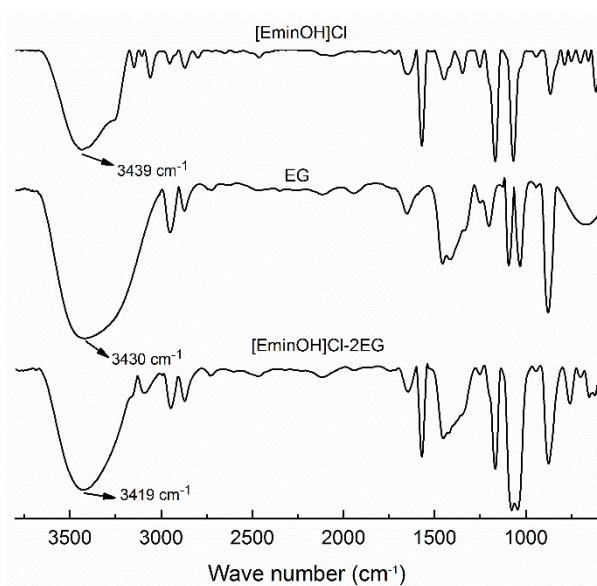

**Figure S8.** FT-IR spectra of  $[\text{EminOH}]\text{Cl}$ , EG and  $[\text{EminOH}]\text{Cl}\cdot 2\text{EG}$ .

### **$[\text{EminOH}]\text{Cl}\cdot 2\text{EG}$**

$^1\text{H}$  NMR (600 MHz, DMSO)  $\delta$  9.23 (s, 1H), 7.77 (t,  $J = 1.7$  Hz, 1H), 7.73 (t,  $J = 1.7$  Hz, 1H), 5.39 (s, 1H), 4.54 (s, 4H), 4.23 (dd,  $J = 6.6, 3.5$  Hz, 2H), 3.87 (s, 3H), 3.74 – 3.68 (m, 2H), 3.38 (s, 8H). FT-IR (KBr)  $\nu$ : 3419, 3093, 2941, 2876, 1645, 1574, 1449, 1165, 1063, 871, 756, 653  $\text{cm}^{-1}$ .

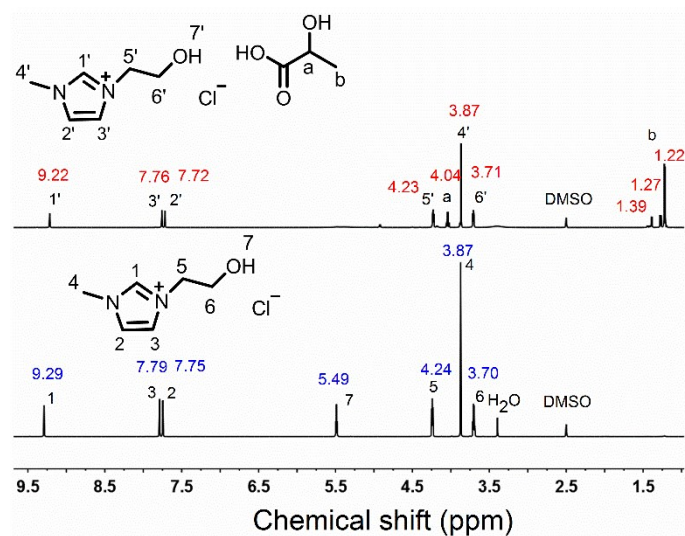

**Figure S9.**  $^1\text{H}$  NMR spectra of [EminOH]Cl-2LA and [EminOH]Cl.

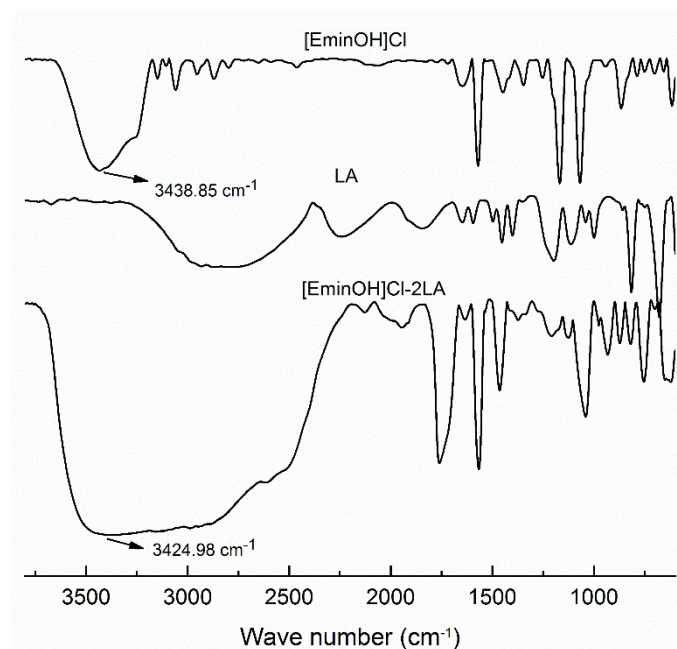

**Figure S10.** FT-IR spectra of [EminOH]Cl, LA and [EminOH]Cl-2LA.

### [EminOH]Cl-2LA

$^1\text{H}$  NMR (600 MHz, DMSO)  $\delta$  9.22 (s, 1H), 7.76 (t,  $J = 1.7$  Hz, 1H), 7.72 (t,  $J = 1.7$  Hz, 1H), 4.23 (dd,  $J = 6.6, 3.5$  Hz, 2H), 4.04 (q,  $J = 6.9$  Hz, 2H), 3.87 (d,  $J = 8.3$  Hz, 3H), 3.72 – 3.69 (m, 2H), 1.39 (d,  $J = 7.1$  Hz, 1H), 1.27 (d,  $J = 6.9$  Hz, 1H), 1.22 (d,  $J = 6.9$  Hz, 4H). FT-IR (KBr)  $\nu$ : 3425 2134 1946 1759 1566 1462 1373 1204 1129 1045 932 871 815 754 631  $\text{cm}^{-1}$ .



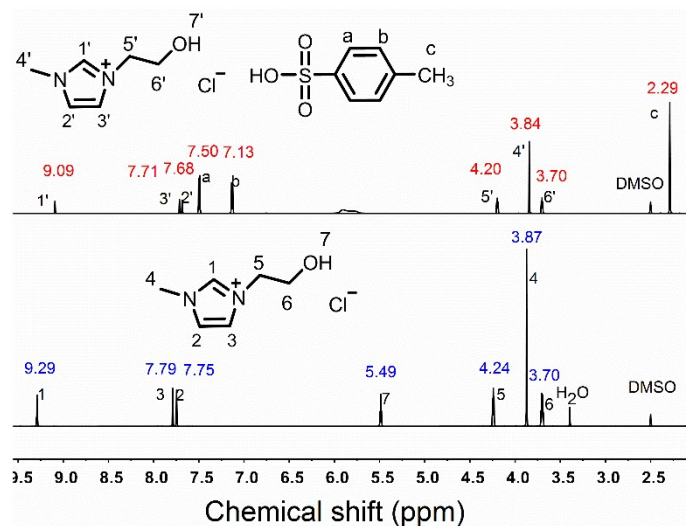

**Figure S11.**  $^1\text{H}$  NMR spectra of  $[\text{EminOH}]\text{Cl}\cdot 2\text{PTSA}$  and  $[\text{EminOH}]\text{Cl}$ .

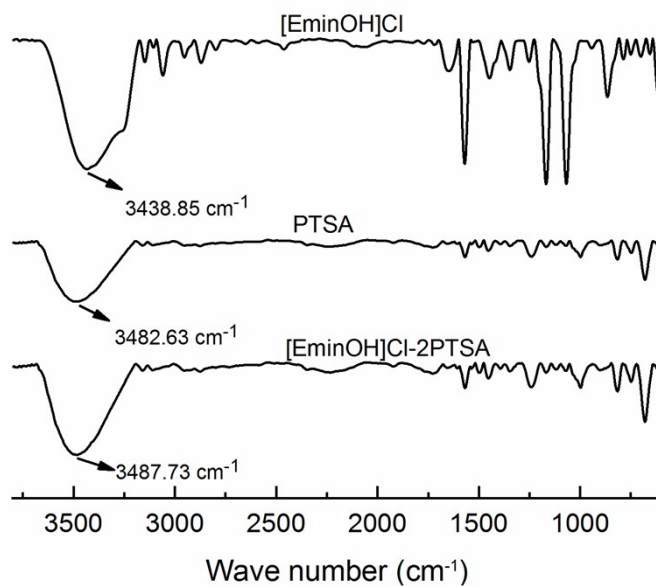

**Figure S12.** FT-IR spectra of  $[\text{EminOH}]\text{Cl}$ , PTSA and  $[\text{EminOH}]\text{Cl}\cdot 2\text{PTSA}$ .

### **$[\text{EminOH}]\text{Cl}\cdot 2\text{PTSA}$**

$^1\text{H}$  NMR (600 MHz, DMSO)  $\delta$  9.09 (s, 1H), 7.71 (t,  $J = 1.6$  Hz, 1H), 7.68 (t,  $J = 1.5$  Hz, 1H), 7.50 (d,  $J = 8.1$  Hz, 4H), 7.13 (d,  $J = 7.9$  Hz, 4H), 4.22 – 4.18 (m, 2H), 3.84 (s, 3H), 3.71 – 3.69 (m, 2H), 2.29 (s, 6H). FT-IR (KBr)  $\nu$ : 3419 3093 2941 2876 1645 1574 1449 1165 1063 871 756 653  $\text{cm}^{-1}$ .

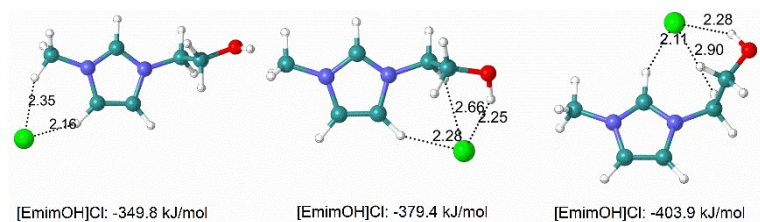

**Figure S13.** Possible hydrogen bonding network structure between the anion and the cation of [EminOH]Cl.

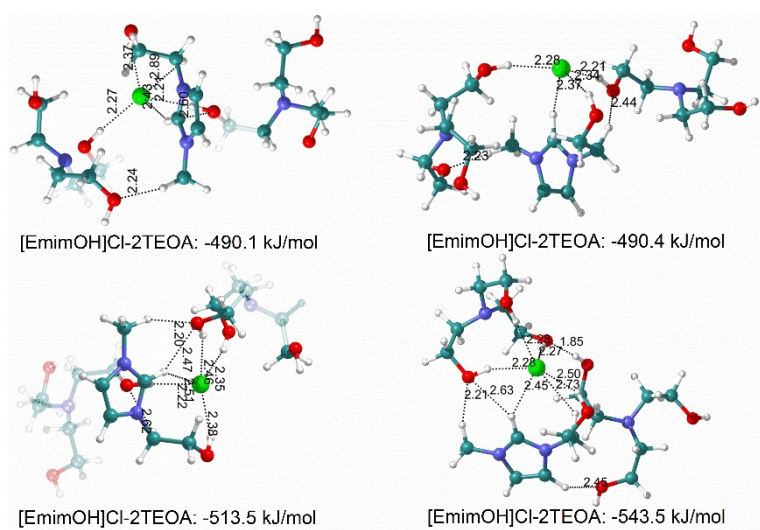

**Figure S14.** Possible hydrogen bonding network structure between [EminOH]Cl and TEOA.

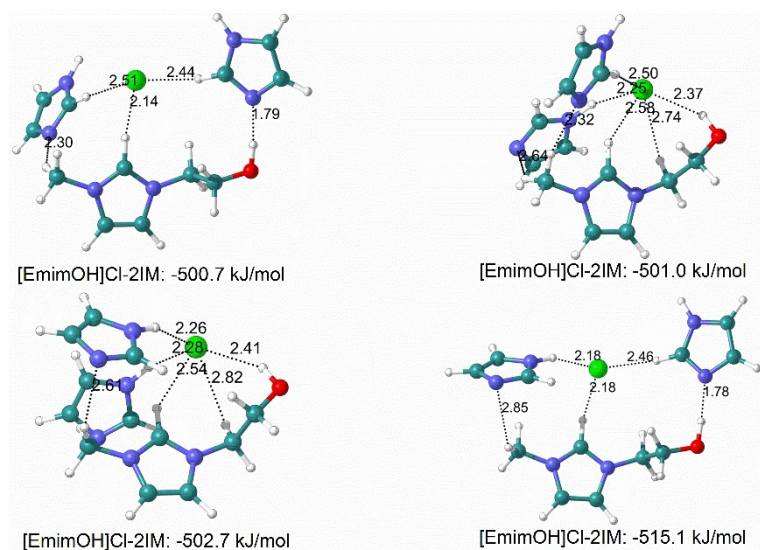

**Figure S15.** Possible hydrogen bonding network structure between [EminOH]Cl and IM.



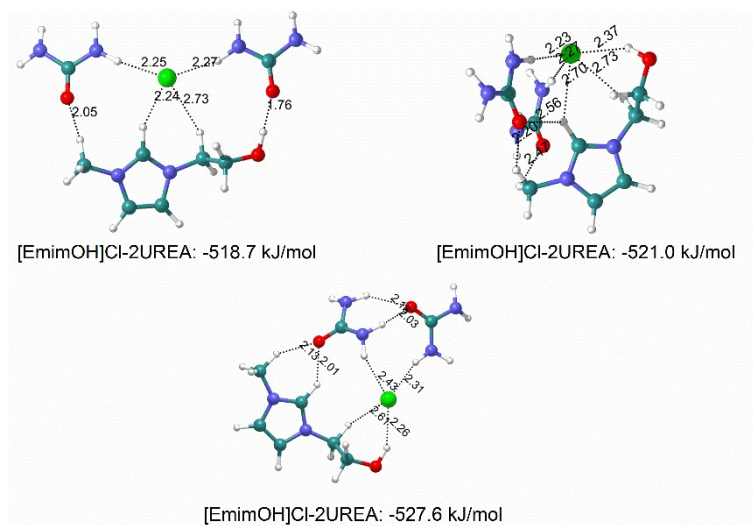

**Figure S16.** Possible hydrogen bonding network structure between [EmimOH]Cl and UREA.

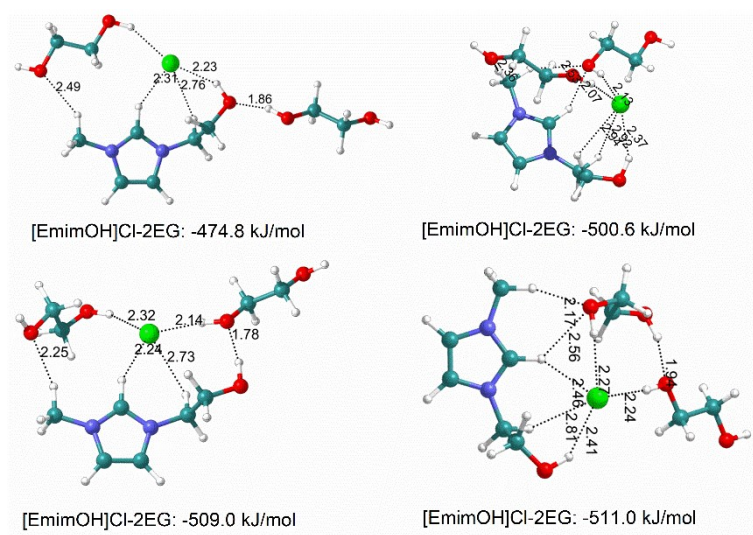

**Figure S17.** Possible hydrogen bonding network structure between [EmimOH]Cl and EG.

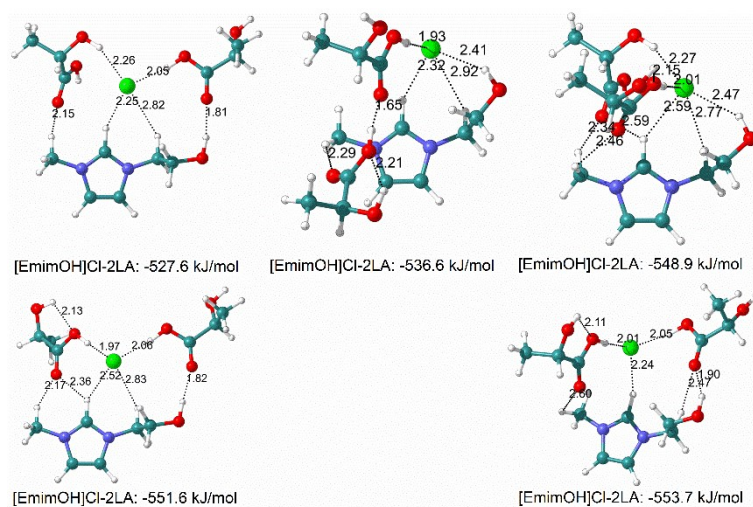

**Figure S18.** Possible hydrogen bonding network structure between [EmimOH]Cl and LA.

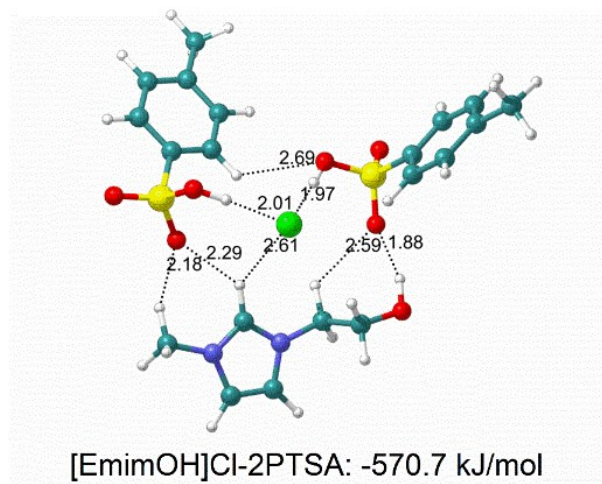

**Figure S19.** Possible hydrogen bonding network structure between [EminOH]Cl and PTSA.

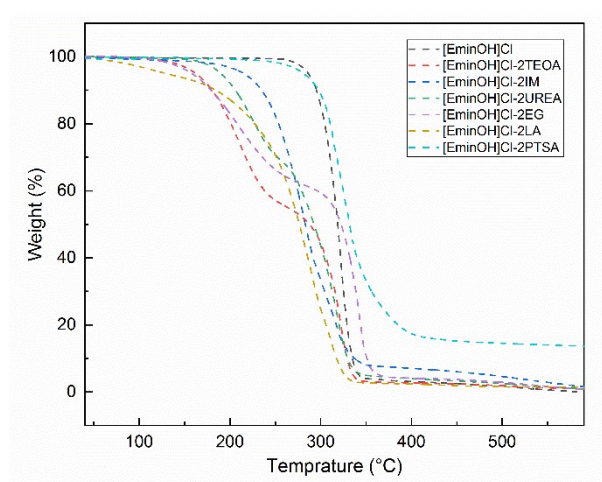

**Figure S20.** TGA curve of the catalysts.

Table S1 Thermal decomposition temperature of the catalysts

| Entry | Catalyst         | T <sub>50%</sub> <sup>a</sup> (°C) |
|-------|------------------|------------------------------------|
| 1     | [EminOH]Cl       | 319                                |
| 2     | [EminOH]Cl-2TEOA | 323                                |
| 3     | [EminOH]Cl-2IM   | 292                                |
| 4     | [EminOH]Cl-2UREA | 283                                |
| 5     | [EminOH]Cl-2EG   | 288                                |
| 6     | [EminOH]Cl-2LA   | 282                                |
| 7     | [EminOH]Cl-2PTSA | 332                                |

<sup>a</sup> The temperature when the weight loss reached 50%.

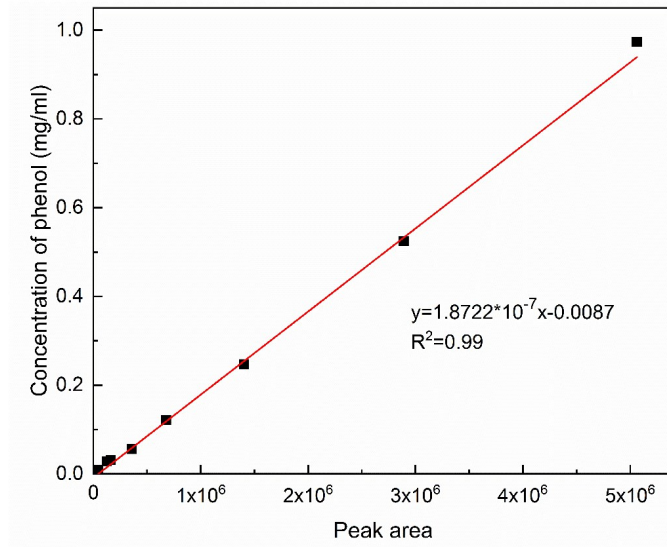

Figure S21. Standard curve equation between peak area and phenol concentration.

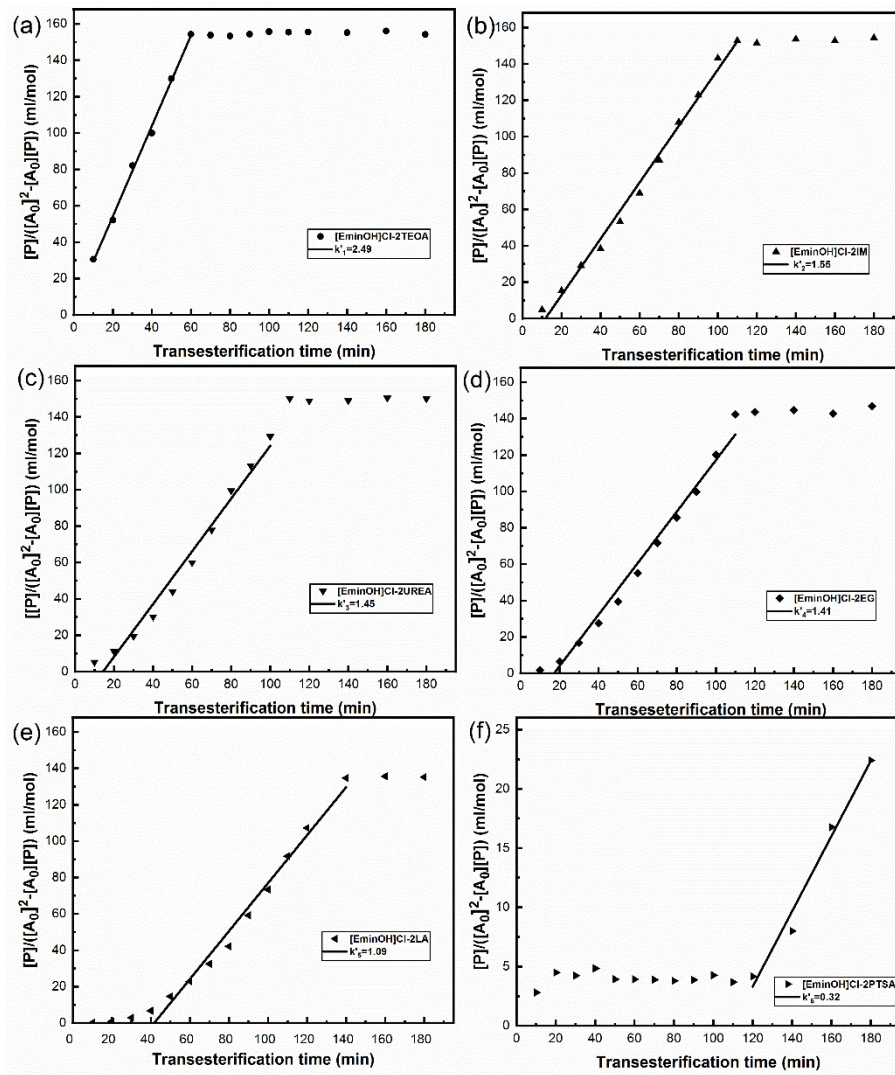

Figure S22.  $k'$  (slope) catalyzed by different DESs at 140 °C.



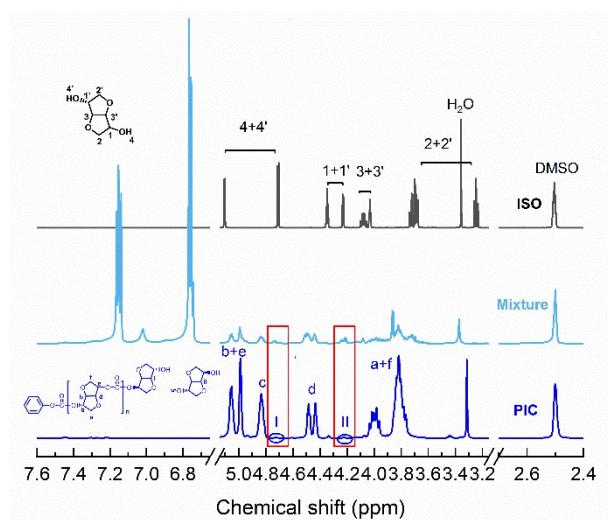

**Figure S23.**  $^1\text{H}$  NMR spectra of ISO, pure PIC and degradation mixture with  $[\text{EminOH}]\text{Cl-2IM}$ .

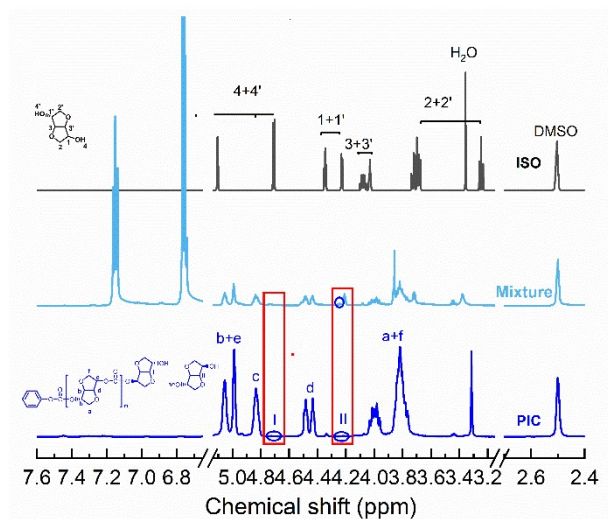

**Figure S24.**  $^1\text{H}$  NMR spectra of ISO, pure PIC and degradation mixture with  $[\text{EminOH}]\text{Cl-2UREA}$ .

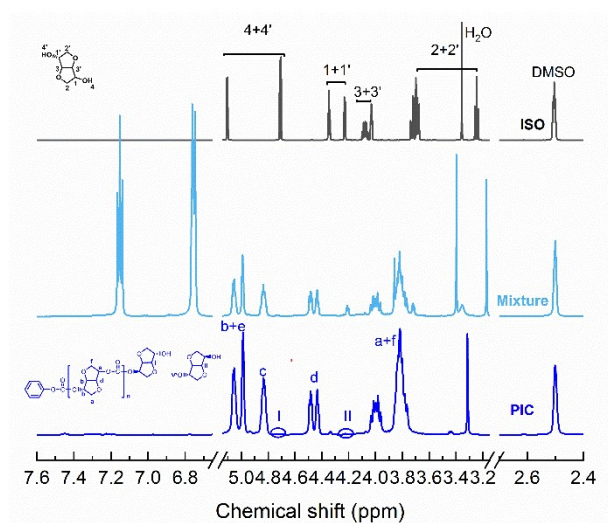

**Figure S25.**  $^1\text{H}$  NMR spectra of ISO, pure PIC and degradation mixture with  $[\text{EminOH}]\text{Cl-2EG}$ .

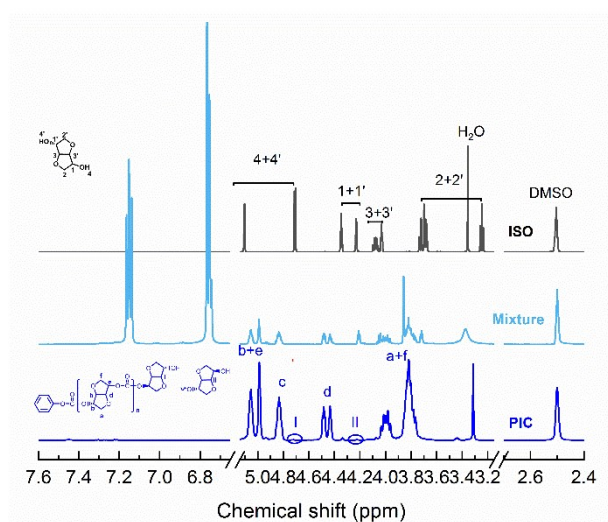

**Figure S26.**  $^1\text{H}$  NMR spectra of ISO, pure PIC and degradation mixture with  $[\text{EminOH}]\text{Cl-2LA}$ .

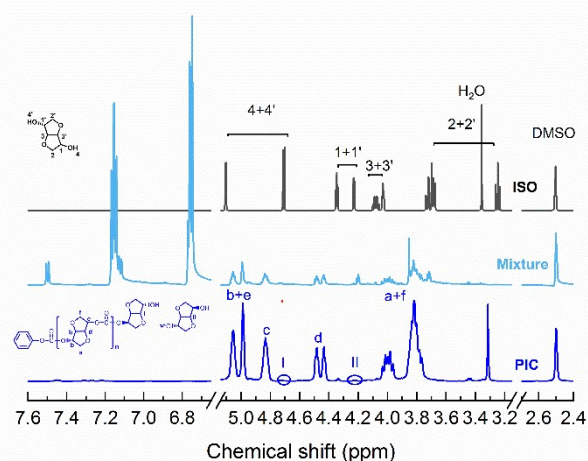

**Figure S27.**  $^1\text{H}$  NMR spectra of ISO, pure PIC and degradation mixture with  $[\text{EminOH}]\text{Cl-2PTSA}$ .

### Structural characterization of PIC

The detailed structure of the PIC prepared by  $[\text{EminOH}]\text{Cl-2EG}$  was determined by  $^1\text{H}$  NMR and  $^{13}\text{C}$  NMR using  $\text{CDCl}_3$  as the deuterated reagent. As was shown in Figure S30 (a), the chemical shifts of the hydrogen atoms labeled 3 and 4 in the repeating unit were 4.98 and 4.54 ppm, respectively. The characteristic peaks appearing at 5.06-5.16 represented the hydrogen atoms at 2 and 5. The peaks of 4 hydrogen atoms appearing at 3.91-4.07 ppm belonged to the chemical shifts of 1 and 6. The characteristic peak appearing at 2.55 ppm belonged to the derivatives of 1,4-sorbitan, a major substance that caused yellowing of PIC.<sup>1,2</sup> Due to the existence of endo-hydroxyl groups and exo-hydroxyl groups in ISO, the carbon atoms on the carbonyl group of PIC had three shift peaks (Figure S18 (b)).<sup>3-5</sup> The peaks at 154, 153.5 and 153 ppm were



derived from the carbon atoms of a<sub>1</sub>, a<sub>2</sub> and a<sub>3</sub>, respectively. Other characteristic peaks were respectively assigned to the carbon atoms on ISO in the repeating unit.

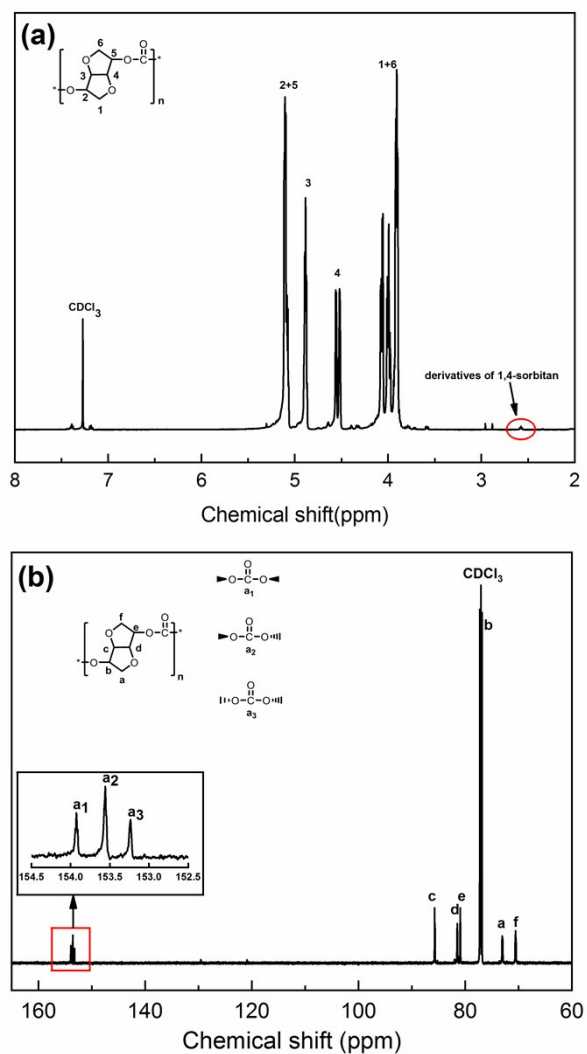

Figure S28. (a) <sup>1</sup>H NMR spectrum and (b) <sup>13</sup>C NMR spectrum of PIC.

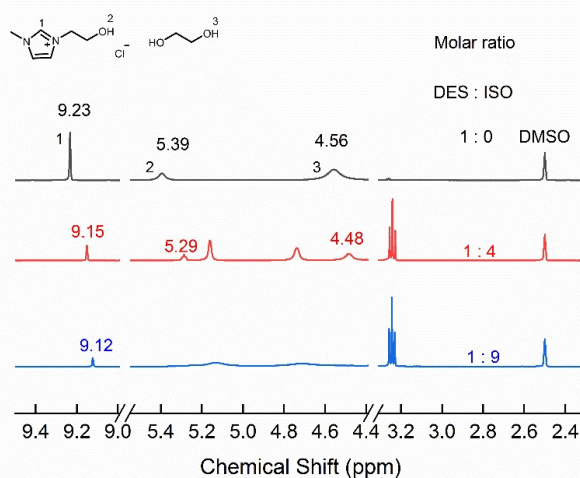

Figure S29. <sup>1</sup>H NMR spectra of ISO and [EminOH]Cl-2EG mixed in different molar ratios.

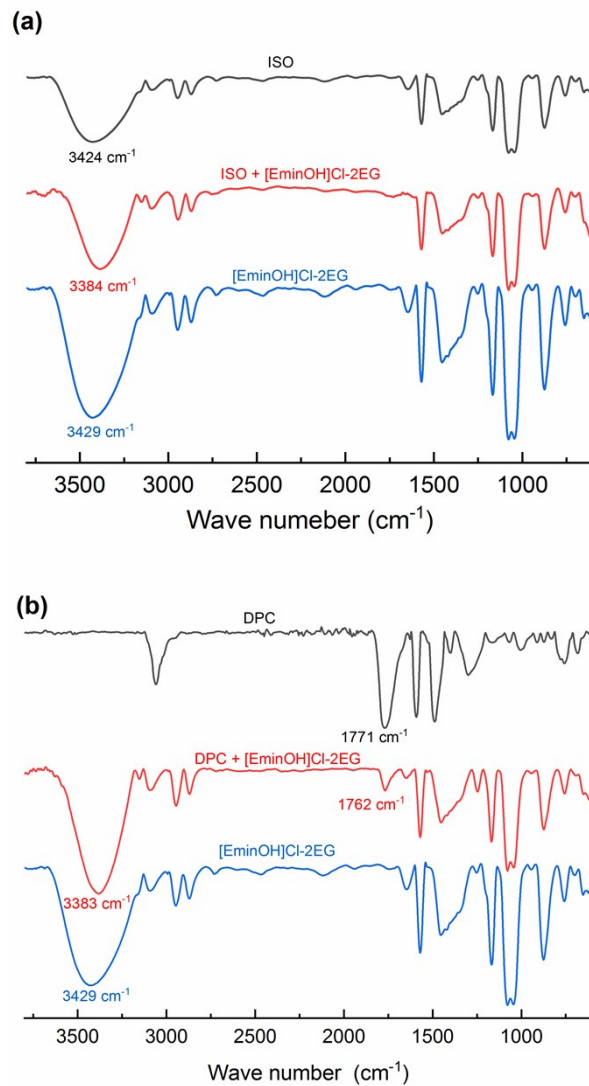

**Figure S30.** FT-IR spectra of (a) ISO with [EminOH]Cl-2EG and (b) DPC with [EminOH]Cl-2EG.

### GPC data

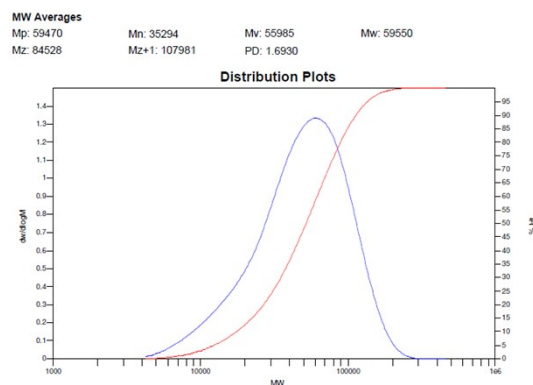

**Figure S31.** PIC synthesized by [EminOH]Cl.

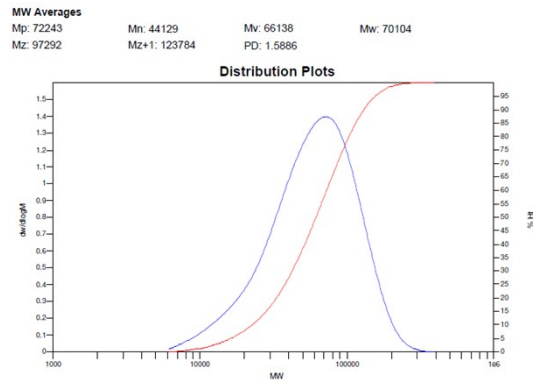

**Figure S32.** PIC synthesized by [EminOH]Cl-2TEOA.

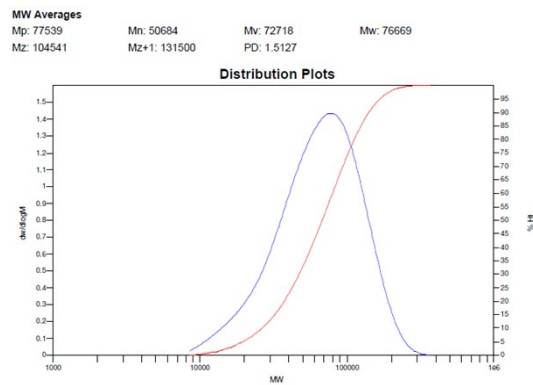

**Figure S33.** PIC synthesized by [EminOH]Cl-2IM.

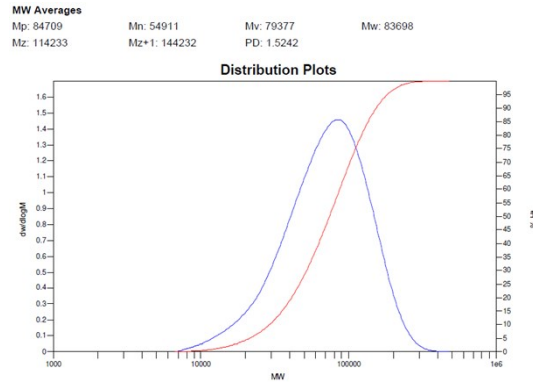

**Figure S34.** PIC synthesized by [EminOH]Cl-2UREA.

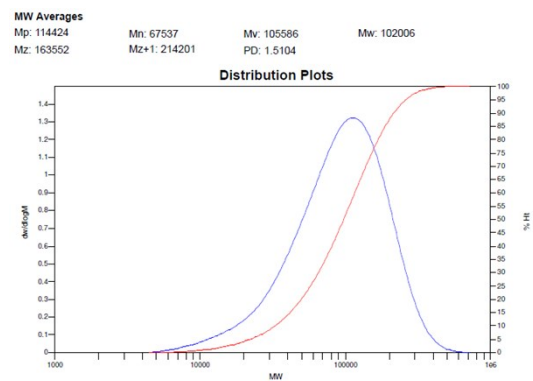

**Figure S35.** PIC synthesized by [EminOH]Cl-2EG.

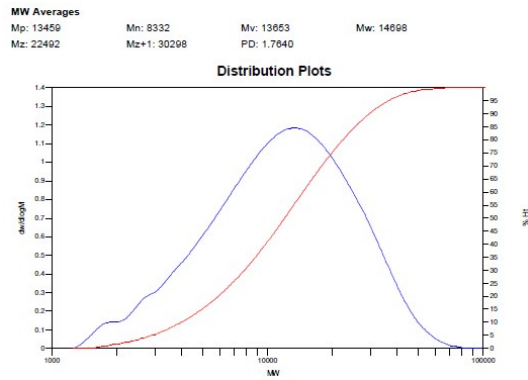

**Figure S36.** PIC synthesized by [EminOH]Cl-2LA.

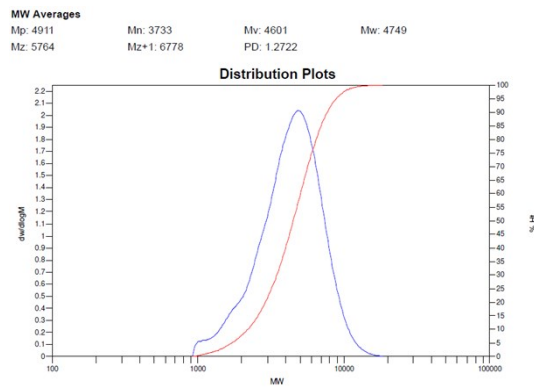

**Figure S37.** PIC synthesized by [EminOH]Cl-2PTSA.

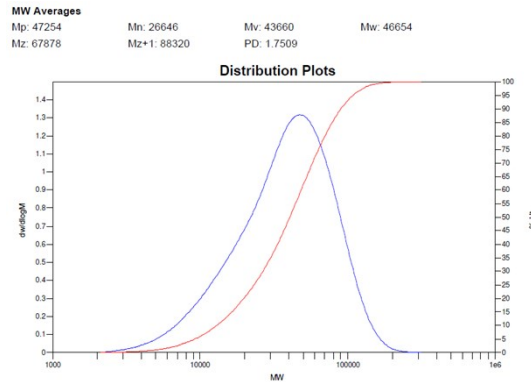

**Figure S38.** PIC synthesized by TEOA.

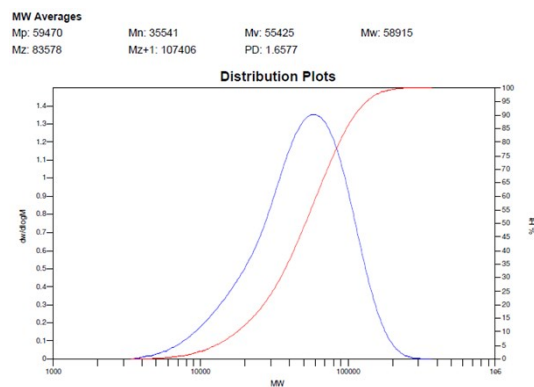

**Figure S39.** PIC synthesized by IM.

MW Averages  
Mp: 47254      Mn: 27893      Mv: 44034      Mw: 46853  
Mz: 66800      Mz+1: 86299      PD: 1.6797

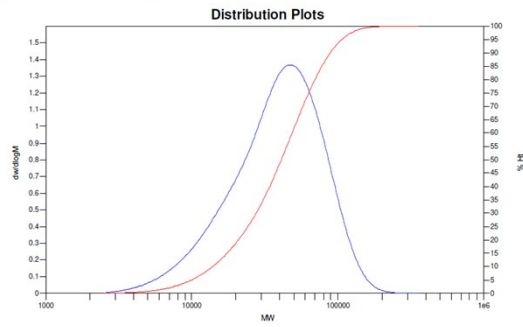

Figure S40. PIC synthesized by UREA.

MW Averages  
Mp: 50718      Mn: 30093      Mv: 47287      Mw: 50278  
Mz: 71344      Mz+1: 91660      PD: 1.6708

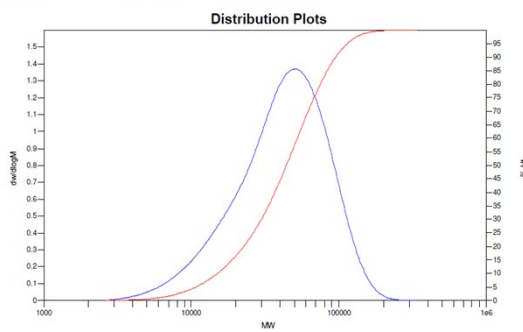

Figure S41. PIC synthesized by EG.

MW Averages  
Mp: 22480      Mn: 13227      Mv: 22833      Mw: 21416  
Mz: 37814      Mz+1: 52545      PD: 1.6191

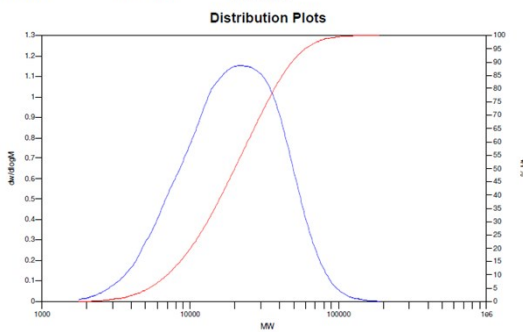

Figure S42. PIC synthesized by LA.

MW Averages  
Mp: 4420      Mn: 3063      Mv: 4357      Mw: 4573  
Mz: 10160      Mz+1: 17488      PD: 1.4929

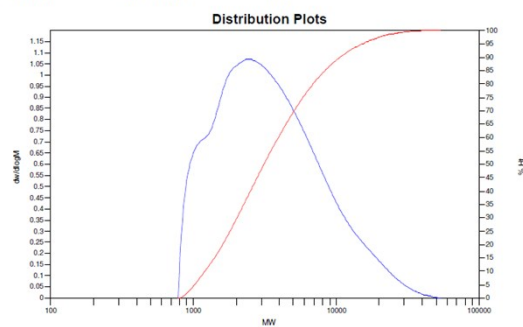

Figure S42. PIC synthesized by PTSA.



## Reference

1. J. Hong, D. Radojicic, M. Ionescu, Z. S. Petrovic and E. Eastwood, *Polymer Chemistry*, 2014, **5**, 5360-5368.
2. J. M. Koo, S. H. Kim and S. S. Im, *Rsc Advances*, 2017, **7**, 6315-6322.
3. C. Ma, F. Xu, W. Cheng, X. Tan, Q. Su and S. Zhang, *ACS Sustainable Chemistry & Engineering*, 2018, **6**, 2684-2693.
4. Z. C. Zhang, F. Xu, Y. Q. Zhang, C. H. Li, H. Y. He, Z. F. Yang and Z. X. Li, *Green Chem.*, 2020, **22**, 2534-2542.
5. M. Zhang, W. Lai, L. Su and G. Wu, *Industrial & Engineering Chemistry Research*, 2018, **57**, 4824-4831.
